# Supplementary material for: <strong></strong>The Effect of Giving a Contrast Bath with an Elevation of 30° on Decreasing the Degree of Edema in Patients with Congestive Heart Failure at Ulin General Hospital, Banjarmasin
Source: Preprints.org preprint supplement (doi:10.20944/preprints202211.0452.v1), 2022-11-24
Supplement: Supplementary file 1 [file supplementary]

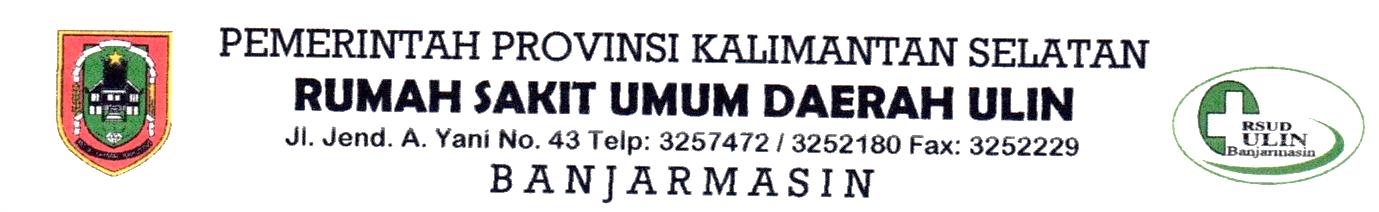


**CERTIFICATE OF RESEARCH ETHICS FEASIBILITY**

No.421 /VIII- RegRiset /RSUDU/21

With Sincerely ,

With this commission ethics study House Sick General of Ulin Banjarmasin Region has study application appropriateness ethics proposed research _ by :

Researcher Name :

1. Siti Norkhalisa
2. Ruwaida Ruwaida
3. Aldrianto Aldrianto
4. Candra Kusuma Negara

| agency | : | Cahaya Bangsa Univercity |
| --- | --- | --- |
| Title | : | **“THE EFFECT OF GIVING A CONTRAST BATH WITH AN ELEVATION OF 30 ° ON DECREASING THE DEGREE OF EDEMA IN PATIENTS WITH CONGESTIVE HEART FAILURE AT ULIN GENERAL HOSPITAL BANJARMASIN”** |
| On Date | : | 3 August 2021 |

Results Ethics :

- Worthy ethics
- Worthy no with suggestion repair
- Not worthy ethics

Thereby Letter description this given for could used as should .

Banjarmasin, 4 August 2021


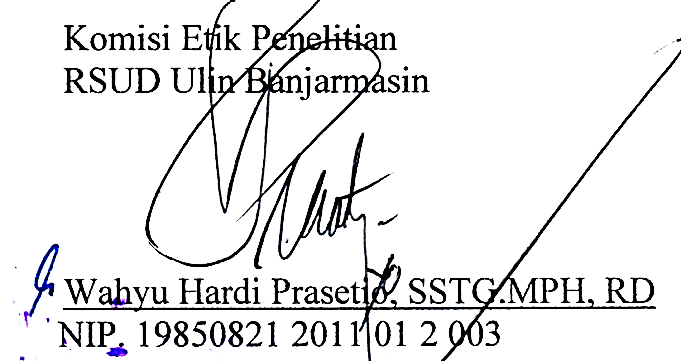


# Lampiran

INFORMED CONSENT

| Title | : | THE EFFECT OF GIVING A CONTRAST BATH WITH AN ELEVATION OF 30 ° ON DECREASING THE DEGREE OF EDEMA IN PATIENTS WITH CONGESTIVE HEART FAILURE AT ULIN GENERAL HOSPITAL BANJARMASIN |
| --- | --- | --- |
| Name Researcher | : | 1. Siti Norkhalisa 2. Ruwaida Ruwaida 3. Aldrianto Aldrianto 4. Candra Kusuma Negara |

We Undergraduate Science Study Program Students Nursing Cahaya Bangsa University To do study at the Ulin Hospital in Banjarmasin. Study this aim for knowing effect of contrast bath with elevation 30 ° to decrease in edema fail heart congestive at the Ulin Hospital in Banjarmasin.

We Expect participation father / mother in give answer on Interview in accordance with agree father / mother without influenced someone else. I will ensure secrecy identity and answer sir / madam , the answer given only for needs research .

Participation father / mother in study this characteristic voluntarily , sir / madam entitled accept and reject Becomes respondent without penalty whatever . If father / mother ready Becomes respondent . Please sign letter agreement this on space provided _ as proof father / mother ready Becomes respondent on study this . Accept love on attention father / mother for study this .


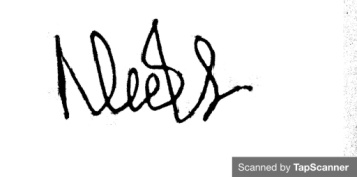
Banjarmasin, 24 September 2021

Nurhayati
